# Supplementary material
Source: PubMed Central journal article supplement (PMC3702628)
Supplement: NIHMS465648-supplement-Supp_Table_S1.pdf [file NIHMS465648-supplement-Supp_Table_S1.pdf]

# Supplement Table I. Platelet Size Measurements

## C560 $\beta$ 3

|                                        | Area   | Length | Width |
|----------------------------------------|--------|--------|-------|
| Mean                                   | 1.69   | 2.28   | 0.91  |
| Std Deviation                          | 0.93   | 0.55   | 0.34  |
| Number Platelets                       | 102    |        |       |
| Platelets >3 $\mu$ m (Length)          | 6.86%  |        |       |
| Platelets >2 $\mu$ m (Width)           | 1.96%  |        |       |
| Platelets >2.5 $\mu$ m (Length)        | 35.29% |        |       |
| Area Platelets >4 $\mu$ m <sup>2</sup> | 2.94%  |        |       |
| Ratio Length/Width 1-1.5               | 4.90%  |        |       |

## R560 $\beta$ 3

|                                        | Area   | Length | Width |
|----------------------------------------|--------|--------|-------|
| Mean                                   | 1.89   | 2.23   | 1.04  |
| Std Deviation                          | 1.06   | 0.50   | 0.43  |
| Number Platelets                       | 104    |        |       |
| Platelets >3 $\mu$ m (Length)          | 6.73%  |        |       |
| Platelets >2 $\mu$ m (Width)           | 4.81%  |        |       |
| Platelets >2.5 $\mu$ m (Length)        | 15.38% |        |       |
| Area Platelets >4 $\mu$ m <sup>2</sup> | 6.73%  |        |       |
| Ratio Length/Width 1-1.5               | 19.23% |        |       |
