# Supplementary material
Source: PubMed Central journal article supplement (PMC3702628)
Supplement: NIHMS465648-supplement-upp_Fig_S1.pdf [file NIHMS465648-supplement-upp_Fig_S1.pdf]

## Supplement Figure 1

C 560  $\beta 3$

R 560  $\beta 3$

**A**  
*Megs in vitro*

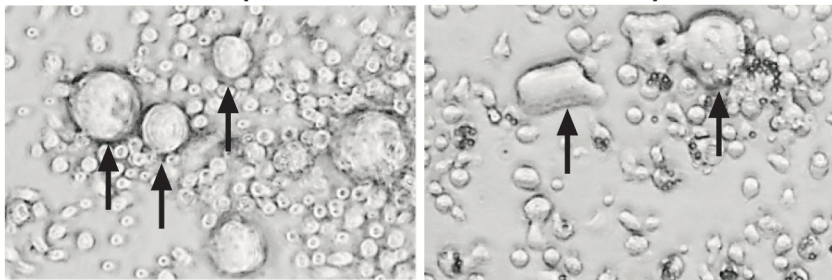

### Figure Legend

**Supplement Figure 1. Megakaryocyte Structure was Abnormal Following Tissue Culture of R560 $\beta 3$ -transduced bone marrow.**

To determine if cellular morphology was altered, lentivirus-transduced murine bone marrow was induced with cytokines to form megakaryocytes *in vitro*. After 4 days in culture, light microscopic analysis (Magnification 400x) revealed that the C560 $\beta 3$  megakaryocytes appeared large and round in shape as anticipated (**Arrow, Left Panel**). In contrast, mice tx with R560 $\beta 3$  transduced bone marrow had formed megakaryocytes that were large but appeared very irregular in shape (**Arrow, Right Panel**)..
